# Supplementary material for: The association between the amount and timing of coffee consumption with chronic kidney disease in diabetic patients
Source: Royal Society of Chemistry journal article supplement (doi:10.1039/d4fo02777a), 2024-01-01
Supplement: d4fo02777a1.pdf [file d4fo02777a1.pdf]

**Supplementary Figure 1. The Association of coffee consumption (status, total daily amount, and timing) with CKD prevalence in non-diabetic patients.**

| Characteristics                       | Med(Q1, Q3) g/kg      | Events/N   | OR (95% CI)     | P-value |
|---------------------------------------|-----------------------|------------|-----------------|---------|
| <b>All day coffee intake</b>          |                       |            |                 |         |
| <b>Coffee intake status</b>           |                       |            |                 |         |
| no                                    | 0.000 (0.000, 0.000)  | 1719/14492 | Reference       |         |
| yes                                   | 4.193 (2.957, 6.423)  | 2665/16061 | 0.86(0.78,0.93) | <0.001  |
| <b>Coffee intake (g/kg)</b>           |                       |            |                 |         |
| T1                                    | 0.000 (0.000, 0.000)  | 1719/14492 | Reference       | <0.001  |
| T2                                    | 2.957 (2.255, 3.539)  | 1527/8031  | 0.98(0.89,1.08) |         |
| T3                                    | 6.423 (5.065, 9.182)  | 1138/8030  | 0.76(0.69,0.83) |         |
| <b>Dawn to forenoon coffee intake</b> |                       |            |                 |         |
| <b>Coffee intake status</b>           |                       |            |                 |         |
| no                                    | 0.000 (0.000, 0.000)  | 3594/25411 | Reference       |         |
| yes                                   | 4.833 (3.279, 7.715)  | 790/5142   | 0.82(0.75,0.90) | <0.001  |
| <b>Coffee intake (g/kg)</b>           |                       |            |                 |         |
| T1                                    | 0.000 (0.000, 0.000)  | 3594/25411 | Reference       | <0.001  |
| T2                                    | 3.279 (2.552, 3.994)  | 453/2571   | 0.93(0.83,1.05) |         |
| T3                                    | 7.715 (6.051, 11.326) | 337/2571   | 0.70(0.62,0.80) |         |
| <b>Forenoon to noon coffee intake</b> |                       |            |                 |         |
| <b>Coffee intake status</b>           |                       |            |                 |         |
| no                                    | 0.000 (0.000, 0.000)  | 3217/23675 | Reference       |         |
| yes                                   | 4.161 (2.985, 6.267)  | 1167/6878  | 1.01(0.93,1.09) | 0.84    |
| <b>Coffee intake (g/kg)</b>           |                       |            |                 |         |
| T1                                    | 0.000 (0.000, 0.000)  | 3217/23675 | Reference       | 0.78    |
| T2                                    | 2.985 (2.295, 3.552)  | 650/3439   | 1.10(1.00,1.22) |         |
| T3                                    | 6.268 (5.009, 8.727)  | 517/3439   | 0.91(0.82,1.02) |         |
| <b>Noon to evening coffee intake</b>  |                       |            |                 |         |
| <b>Coffee intake status</b>           |                       |            |                 |         |
| no                                    | 0.000 (0.000, 0.000)  | 3959/28379 | Reference       |         |
| yes                                   | 3.613 (2.600, 5.009)  | 425/2174   | 1.11(0.97,1.26) | 0.12    |
| <b>Coffee intake (g/kg)</b>           |                       |            |                 |         |
| T1                                    | 0.000 (0.000, 0.000)  | 3959/28379 | Reference       | 0.09    |
| T2                                    | 2.600 (1.993, 3.108)  | 229/1087   | 1.10(0.93,1.31) |         |
| T3                                    | 5.011 (4.229, 6.650)  | 196/1087   | 1.11(0.93,1.32) |         |
| <b>Evening to dawn coffee intake</b>  |                       |            |                 |         |
| <b>Coffee intake status</b>           |                       |            |                 |         |
| no                                    | 0.000 (0.000, 0.000)  | 4101/28687 | Reference       |         |
| yes                                   | 3.672 (2.627, 5.491)  | 283/1866   | 0.93(0.81,1.08) | 0.34    |
| <b>Coffee intake (g/kg)</b>           |                       |            |                 |         |
| T1                                    | 0.000 (0.000, 0.000)  | 4101/28687 | Reference       | <0.001  |
| T2                                    | 2.625 (1.957, 3.141)  | 174/933    | 1.13(0.94,1.36) |         |
| T3                                    | 5.493 (4.373, 7.929)  | 109/933    | 0.74(0.59,0.91) |         |
