# Supplementary material for: The association between the amount and timing of coffee consumption with chronic kidney disease in diabetic patients
Source: Royal Society of Chemistry journal article supplement (doi:10.1039/d4fo02777a), 2024-01-01

**Supplementary Figure 2. The Association of coffee consumption (status, total daily amount, and timing) with CKD prevalence in diabetic patients who had a normal coffee consumption level.**

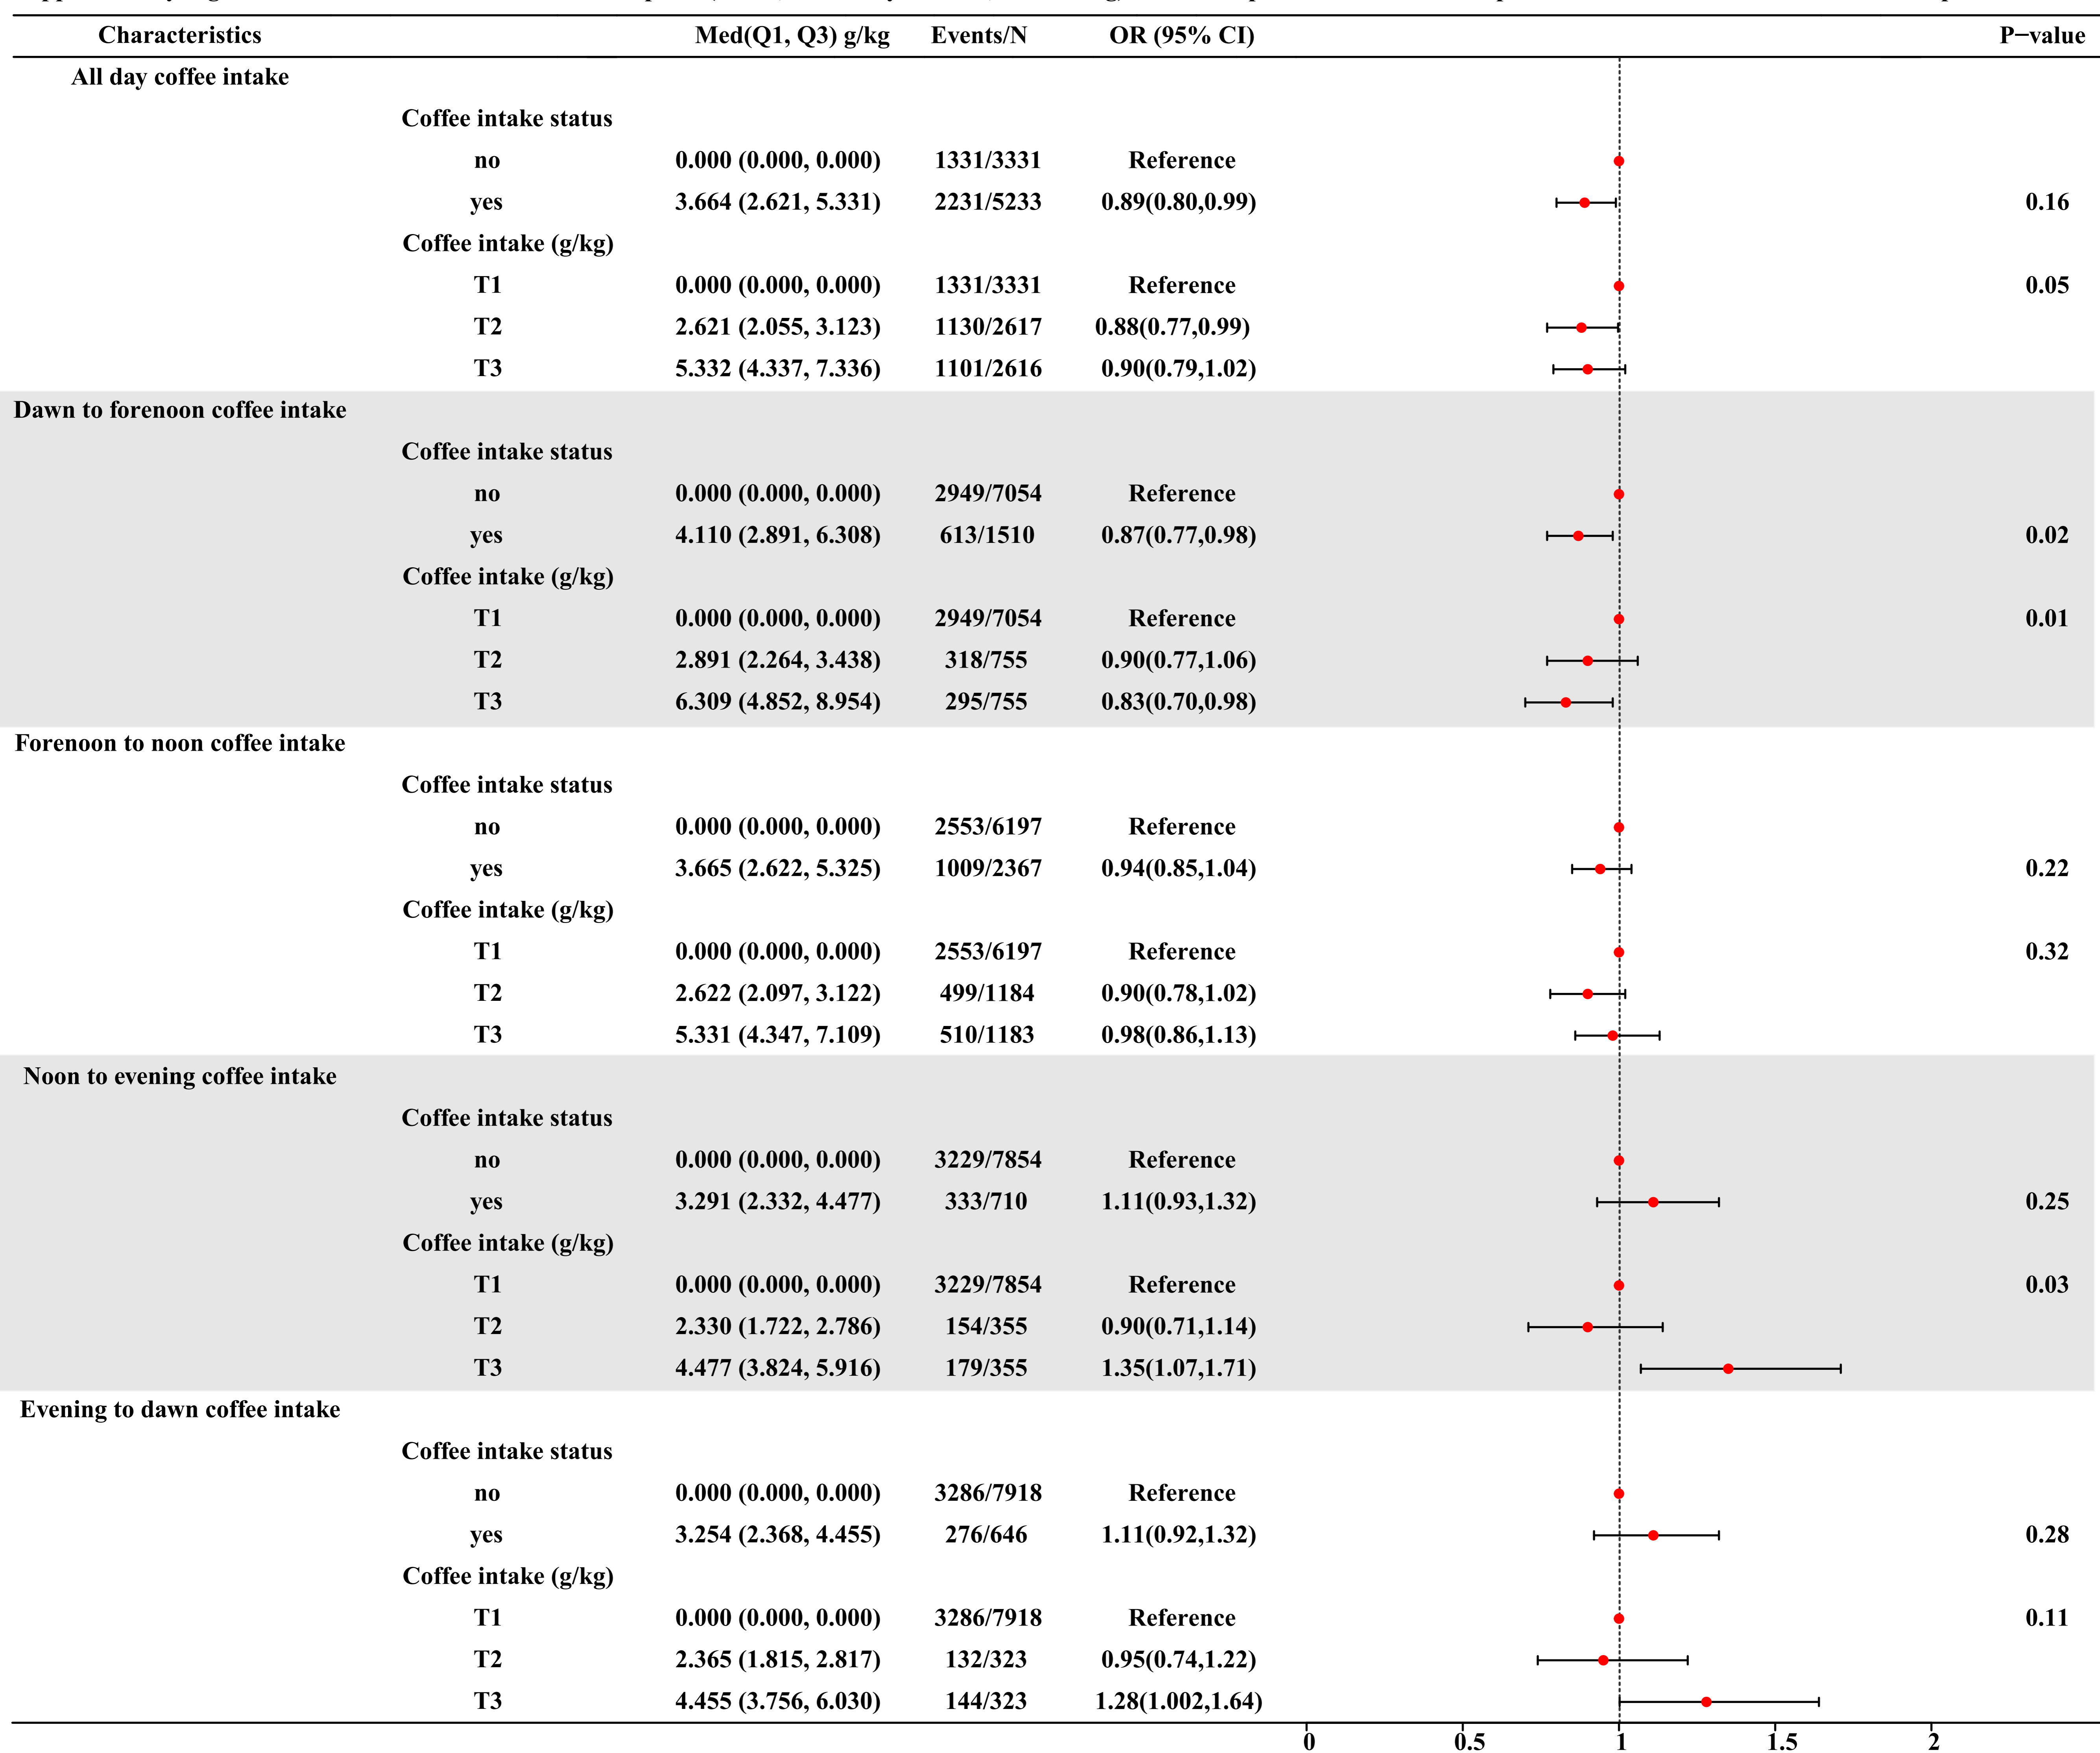

Supplement: d4fo02777a2.pdf [file d4fo02777a2.pdf]
