# Supplementary material for: The association between the amount and timing of coffee consumption with chronic kidney disease in diabetic patients
Source: Royal Society of Chemistry journal article supplement (doi:10.1039/d4fo02777a), 2024-01-01
Supplement: d4fo02777a3.pdf [file d4fo02777a3.pdf]

### **Supplementary Figure legend**

Supplementary Figure 1. The Association of coffee consumption (status, total daily amount, and timing) with CKD prevalence in non-diabetics.

Values are Median value (25%, 75%), events number/total number, and OR (95% CI). Results were adjusted for age, sex, race, education level, smoking, drinking, physical activity, BMI, poverty income ratio, hyperlipidemia, hypertension, frequency of coffee intake across a day. BMI = Body Mass index; CKD = chronic kidney diseases; T = tertile.

Supplementary Figure 2. The Association of coffee consumption (status, total daily amount, and timing) with CKD prevalence in diabetics who had a normal coffee consumption level.

Values are Median value (25%, 75%), events number/total number, and OR (95% CI). Results were adjusted for age, sex, race, education level, smoking, drinking, physical activity, BMI, poverty income ratio, hyperlipidemia, hypertension, frequency of coffee intake across a day. BMI = Body Mass index; CKD = chronic kidney diseases; T = tertile.
